# Supplementary material for: Spirulina platensis Suppressed iNOS and Proinflammatory Cytokines in Lipopolysaccharide-Induced BV2 Microglia
Source: MDPI journal article supplement (doi:10.3390/metabo12111147), 2022-11-20

Figure S1: Original Western blot images for three repeats of iNOS, COX-2 and  $\beta$ -actin

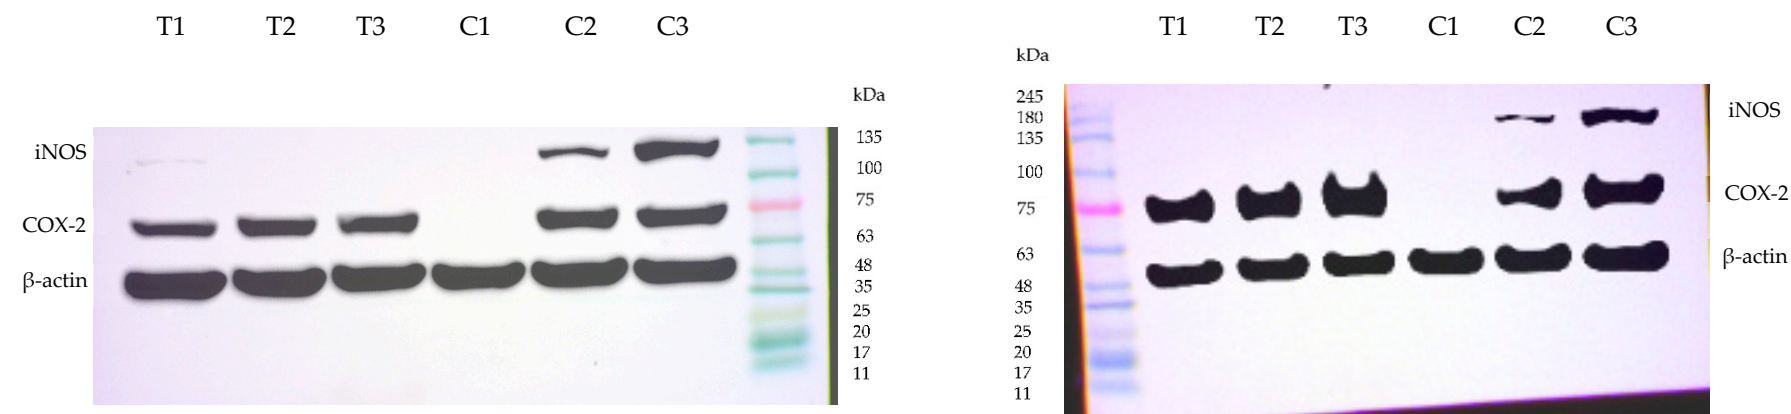

Representative blot shown in main text (Repeat 1)

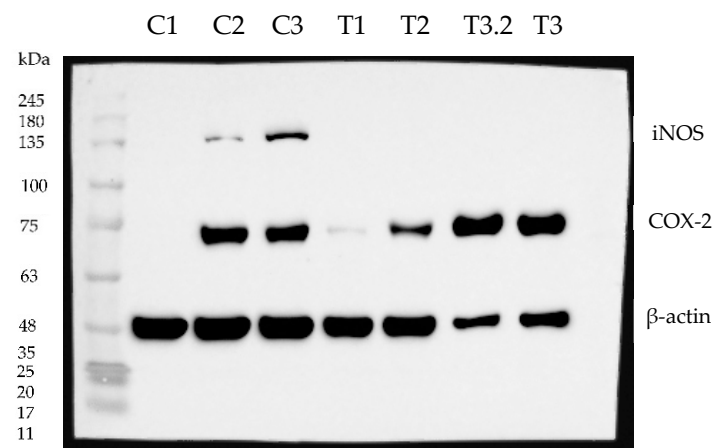

Repeat 3

Repeat 2

T1: *Spirulina platensis* ethanol extract 0.5 mg/mL  
T2: *Spirulina platensis* ethanol extract 1 mg/mL  
T3: *Spirulina platensis* ethanol extract 2 mg/mL  
C1: Negative control (Untreated)  
C2: Lipopolysaccharide (LPS) control (Stimulated with 1  $\mu$ g/mL LPS)

**Excluded in the main text:**

C3: Positive control (Stimulated with 1  $\mu$ g/mL LPS + treated with N( $\gamma$ )-nitro-L-arginine methyl ester (L-NAME))  
T3.2: Replicate of *Spirulina platensis* ethanol extract 2 mg/mL

**Molecular weight of the target proteins:**

iNOS – 130 kDa  
COX-2 – 74 kDa  
 $\beta$ -actin – 45 kDa

Figure S2: Chromatogram of *S. platensis* ethanol extract

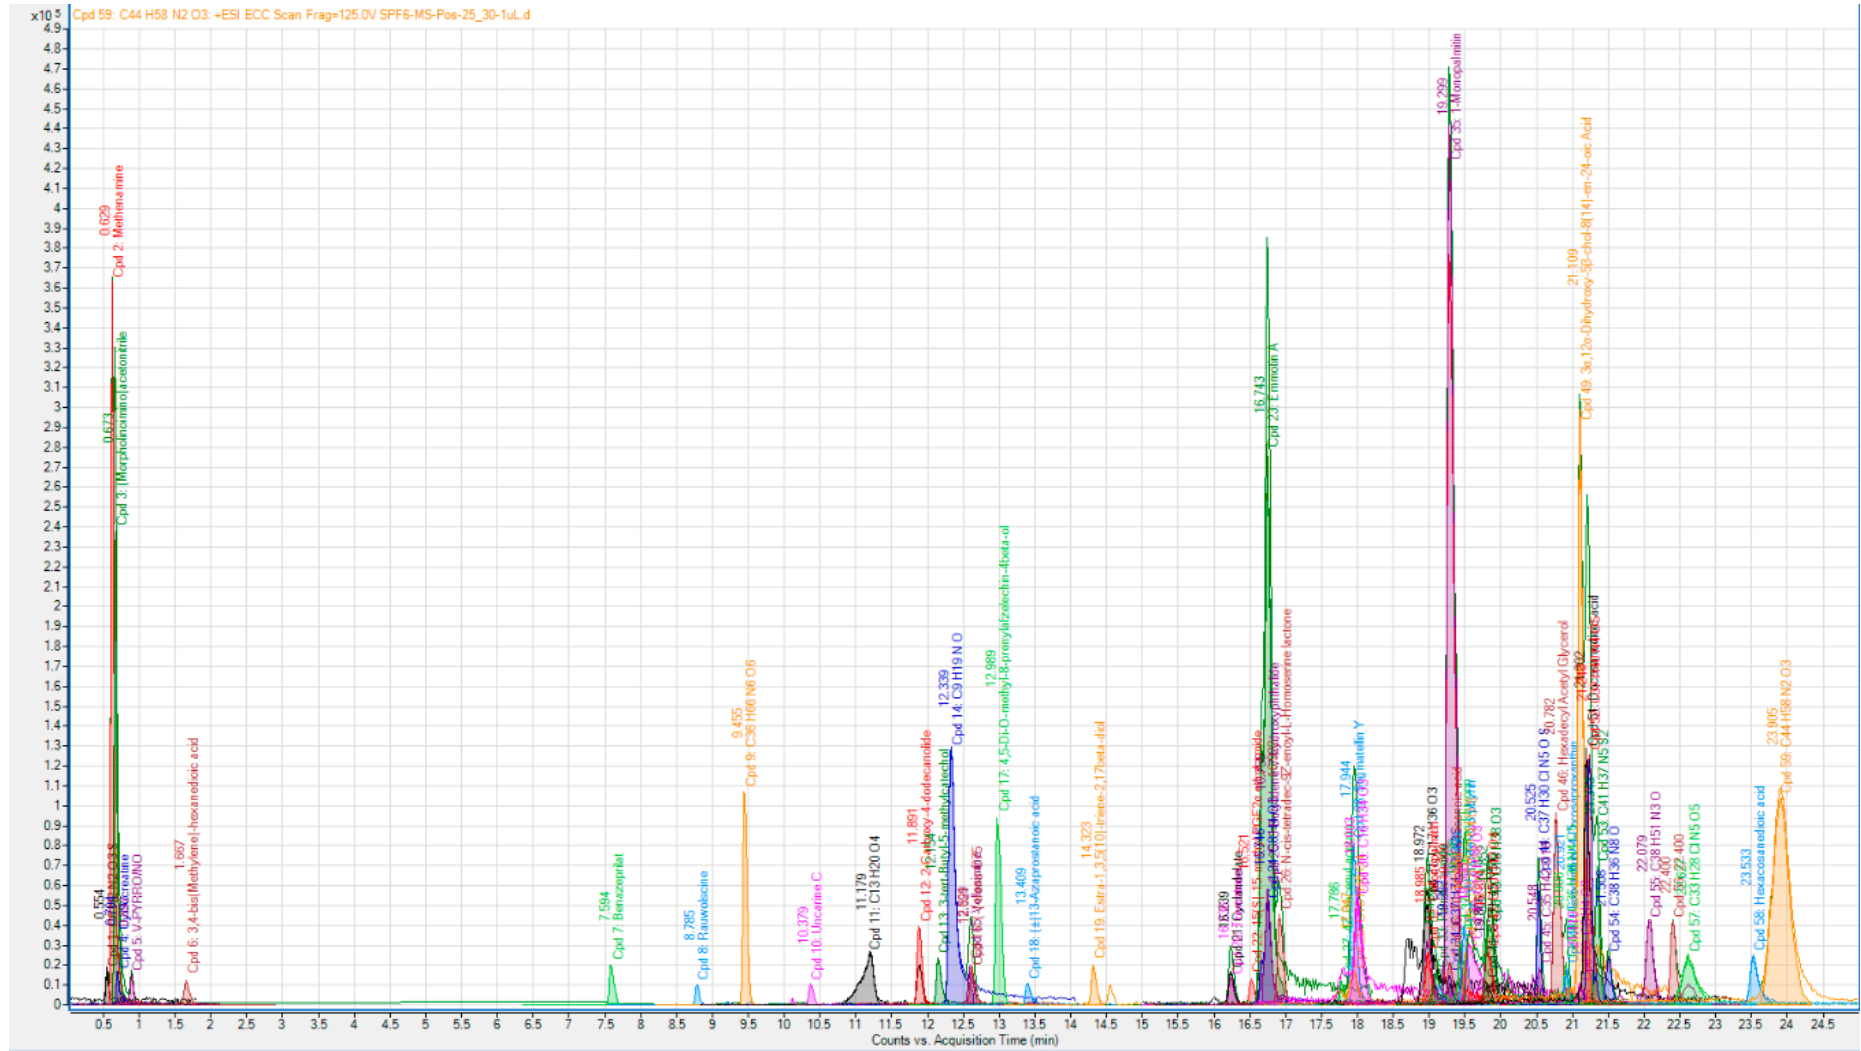

Figure S3: Mass spectra of individual compounds

Compound i: Methenamine

| Compound Label     | Name        | m/z      | RT    | Algorithm                 | Mass    |
|--------------------|-------------|----------|-------|---------------------------|---------|
| Cpd 2: Methenamine | Methenamine | 141.1132 | 0.629 | Find by Molecular Feature | 140.106 |

Compound Chromatograms

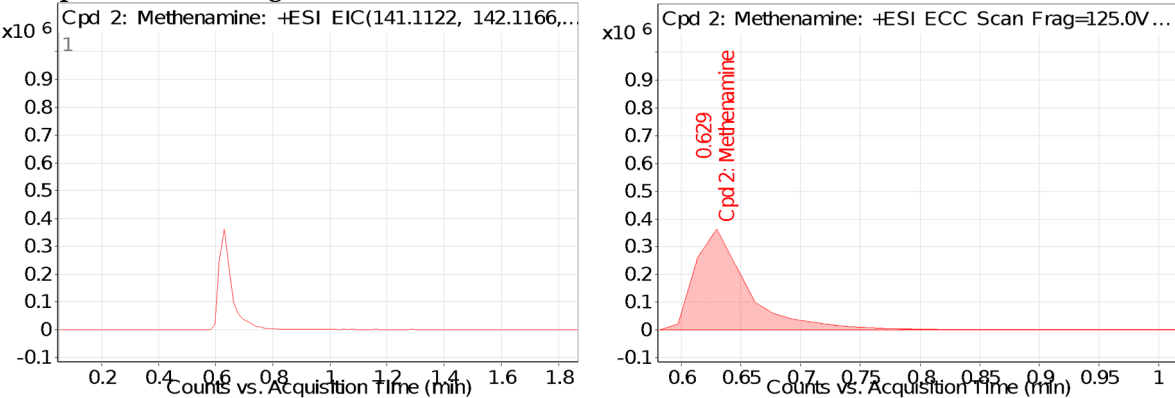

MFE MS Spectrum

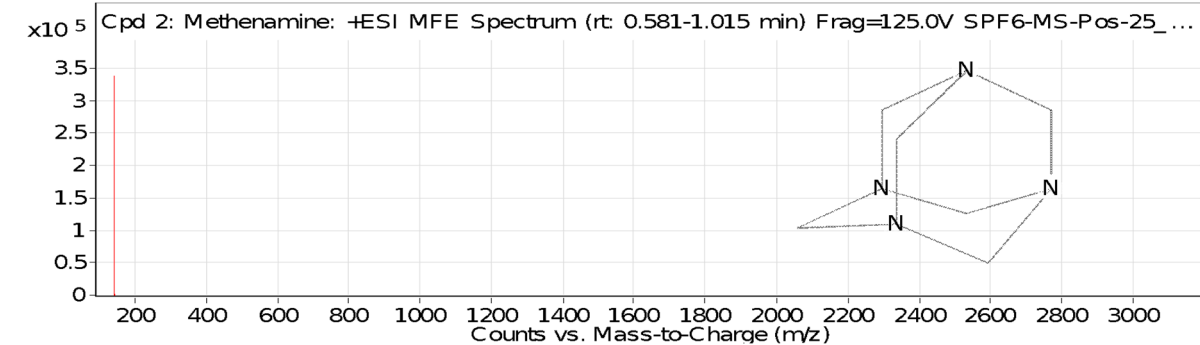

### Compound ii: Morpholinoiminoacetonitrile

| Compound Label                          | Name                          | <i>m/z</i> | RT    | Algorithm                 | Mass     |
|-----------------------------------------|-------------------------------|------------|-------|---------------------------|----------|
| Cpd 3:<br>(Morpholinoimino)acetonitrile | (Morpholinoimino)acetonitrile | 157.1081   | 0.673 | Find by Molecular Feature | 139.0742 |

### Compound Chromatograms

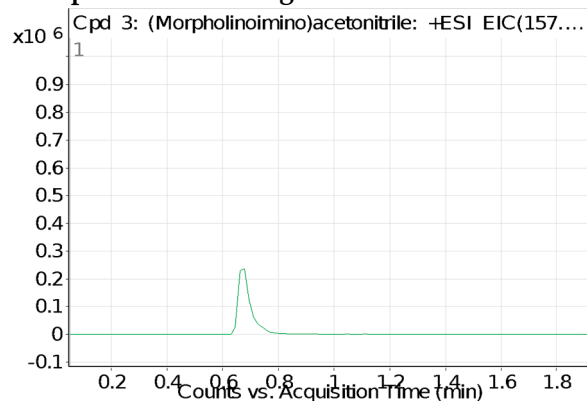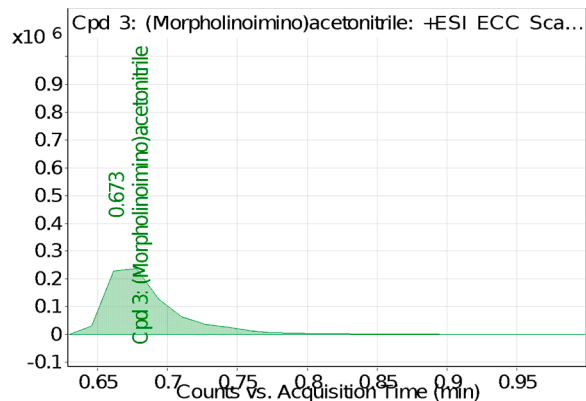

### MFE MS Spectrum

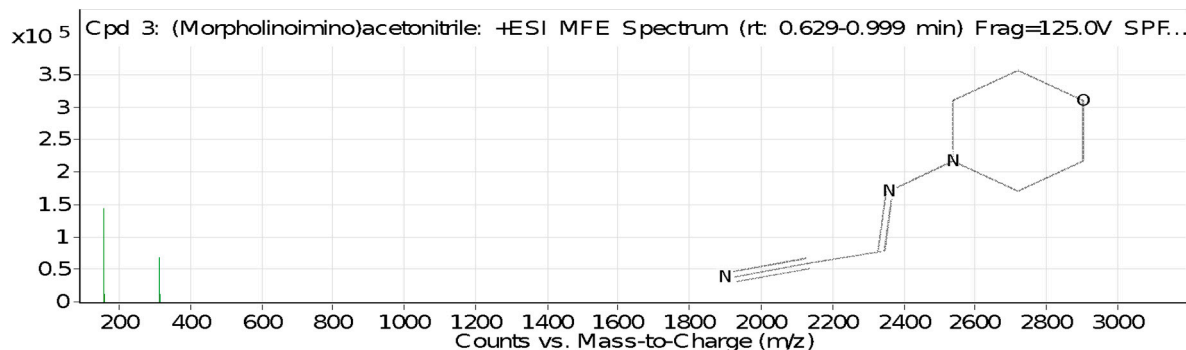

### Compound iii: Benazeprilat

| Compound Label      | Name         | <i>m/z</i> | RT    | Algorithm                 | Mass     |
|---------------------|--------------|------------|-------|---------------------------|----------|
| Cpd 7: Benazeprilat | Benazeprilat | 397.1761   | 7.594 | Find by Molecular Feature | 396.1687 |

### Compound Chromatograms

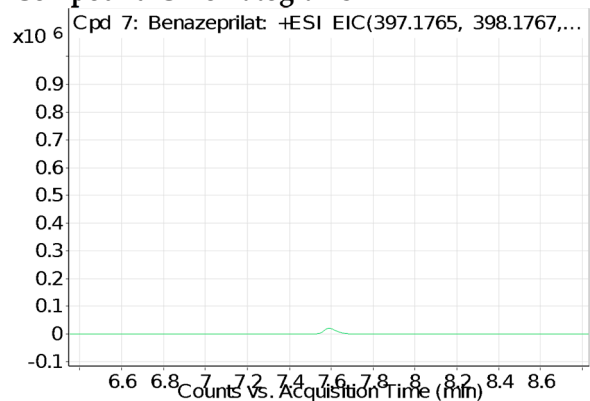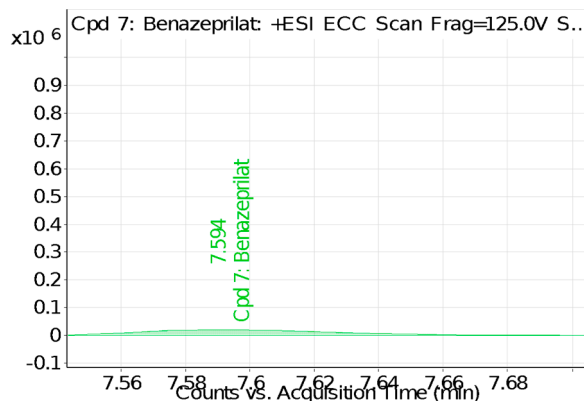

### MFE MS Spectrum

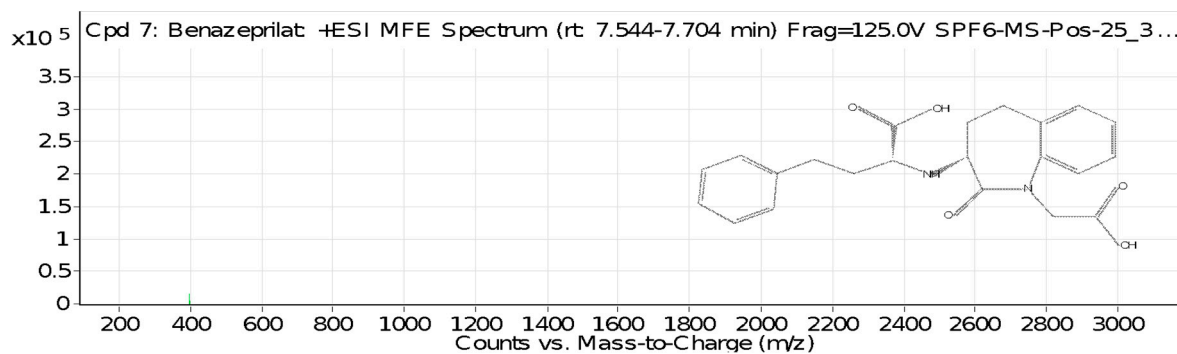

### Compound iv: Rauwolscline

| Compound Label      | Name         | <i>m/z</i> | RT    | Algorithm                 | Mass     |
|---------------------|--------------|------------|-------|---------------------------|----------|
| Cpd 8: Rauwolscline | Rauwolscline | 355.2013   | 8.785 | Find by Molecular Feature | 354.1938 |

### Compound Chromatograms

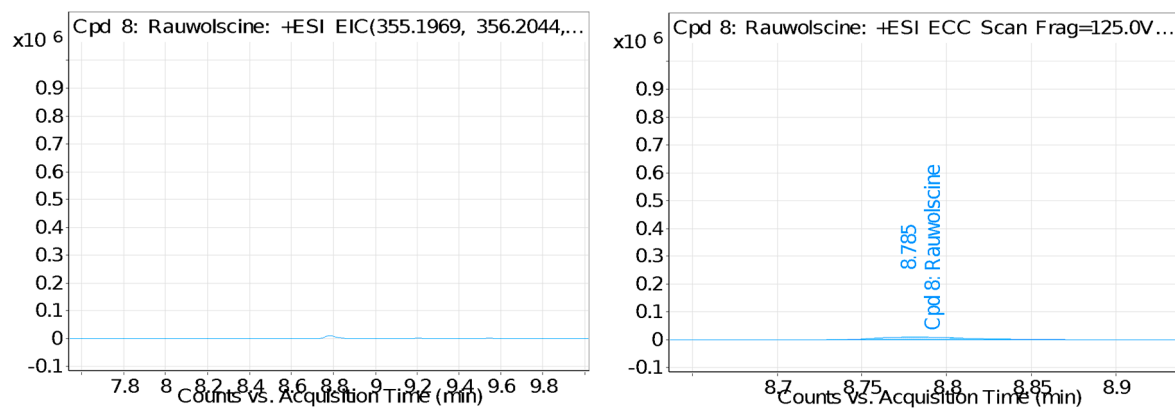

### MFE MS Spectrum

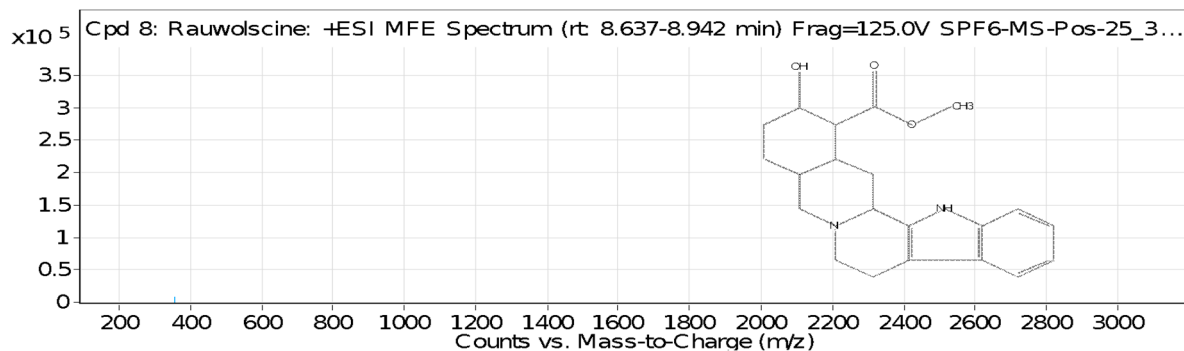

### Compound v: Uncarine C

| Compound Label     | Name       | <i>m/z</i> | RT     | Algorithm                 | Mass     |
|--------------------|------------|------------|--------|---------------------------|----------|
| Cpd 10: Uncarine C | Uncarine C | 369.1806   | 10.379 | Find by Molecular Feature | 368.1734 |

### Compound Chromatograms

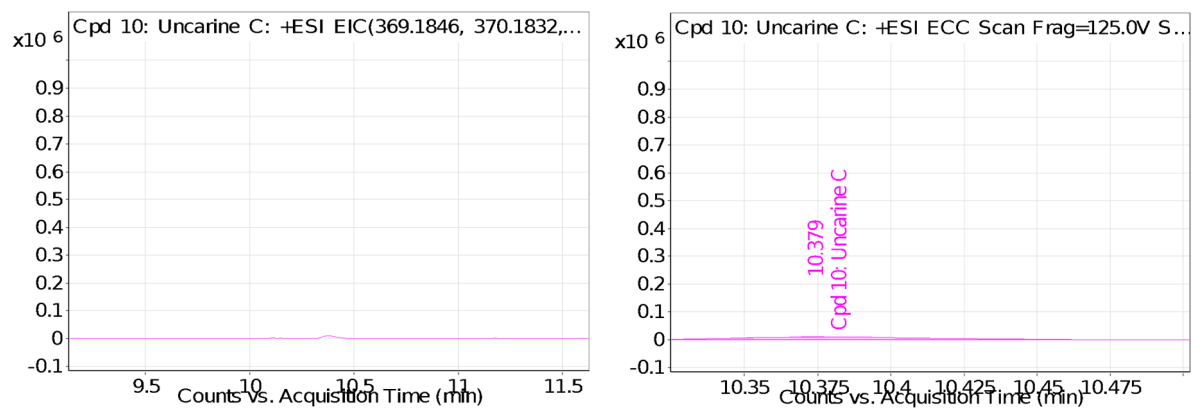

### MFE MS Spectrum

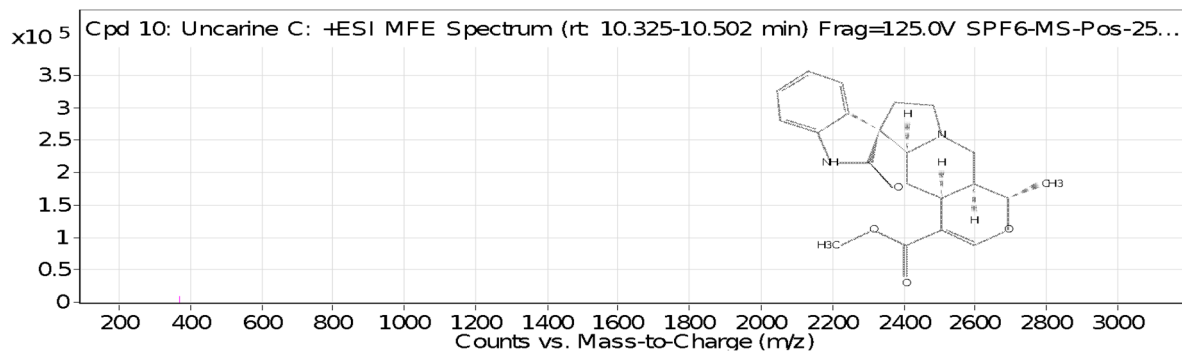

### Compound vi: 2-Carboxy-4-dodecanolide

| Compound Label                   | Name                     | <i>m/z</i> | RT     | Algorithm                 | Mass    |
|----------------------------------|--------------------------|------------|--------|---------------------------|---------|
| Cpd 12: 2-Carboxy-4-dodecanolide | 2-Carboxy-4-dodecanolide | 243.1593   | 11.891 | Find by Molecular Feature | 242.152 |

### Compound Chromatograms

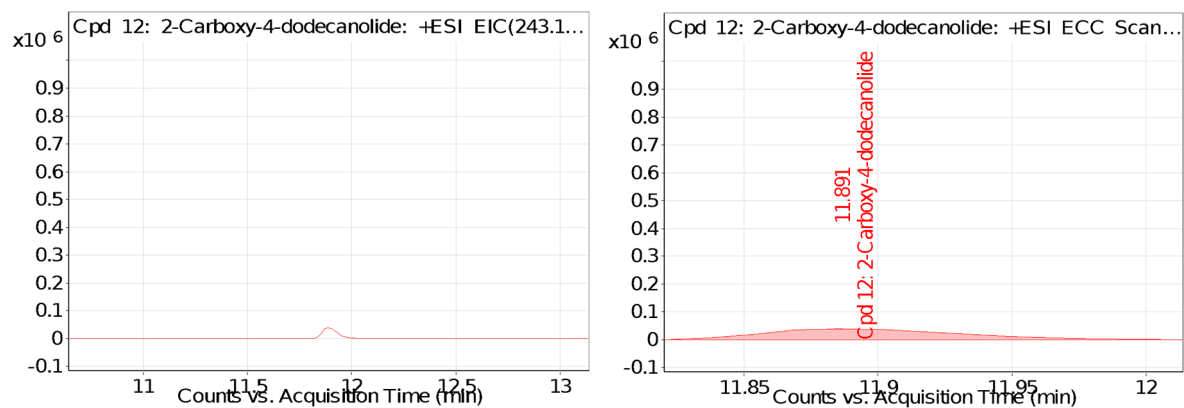

### MFE MS Spectrum

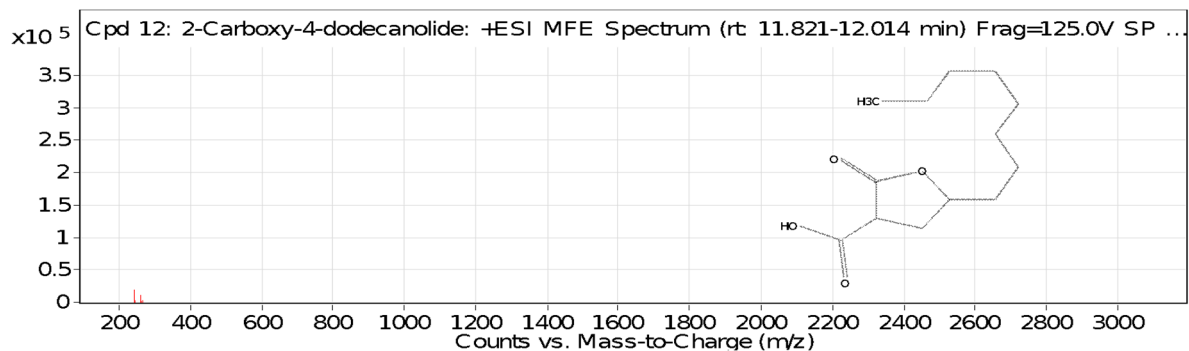



**Compound vii: 4,5-Di-O-methyl-8-prenylafzelechin-4beta-ol**

| Compound Label                                      | Name                                               | <i>m/z</i> | RT     | Algorithm                 | Mass     |
|-----------------------------------------------------|----------------------------------------------------|------------|--------|---------------------------|----------|
| Cpd 17: 4,5-Di-O-methyl-8-prenylafzelechin-4beta-ol | <b>4,5-Di-O-methyl-8-prenylafzelechin-4beta-ol</b> | 404.2063   | 12.989 | Find by Molecular Feature | 386.1734 |

**Compound Chromatograms**

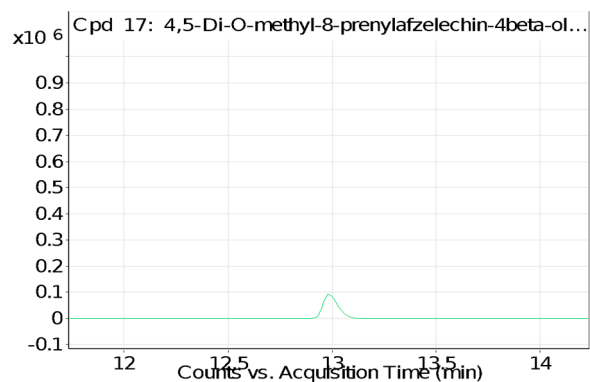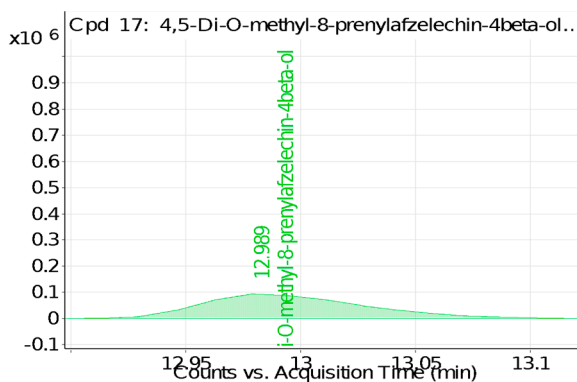

MFE MS Spectrum

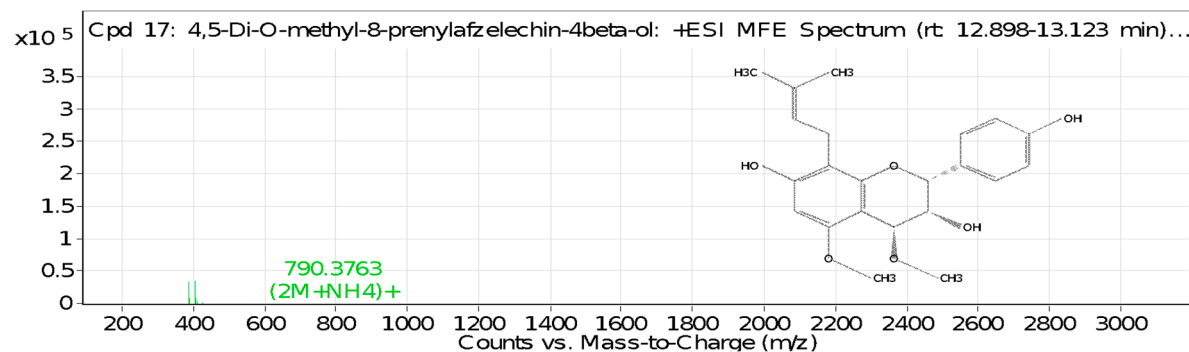

### Compound viii: (±)13-Azaprostanoic acid

| Compound Label                   | Name                     | <i>m/z</i> | RT     | Algorithm                 | Mass     |
|----------------------------------|--------------------------|------------|--------|---------------------------|----------|
| Cpd 18: (±)13-Azaprostanoic acid | (±)13-Azaprostanoic acid | 329.3163   | 13.409 | Find by Molecular Feature | 311.2822 |

### Compound Chromatograms

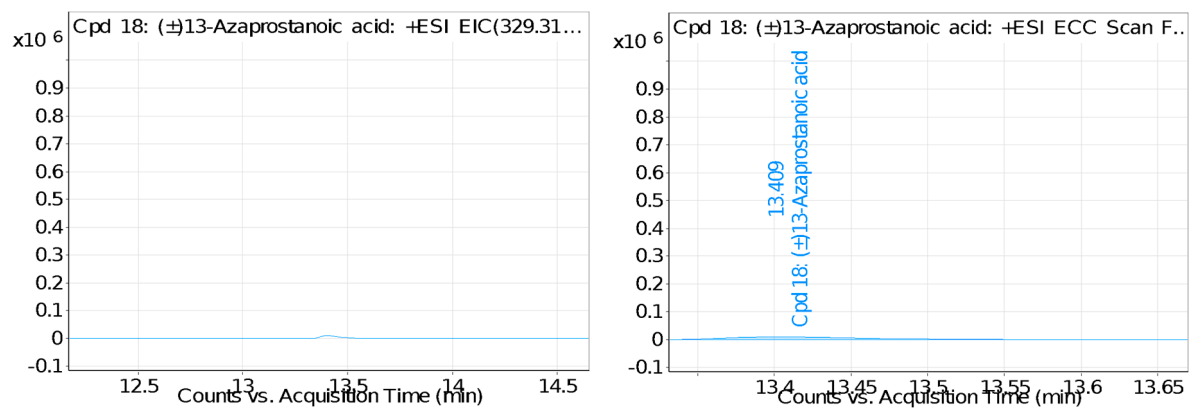

### MFE MS Spectrum

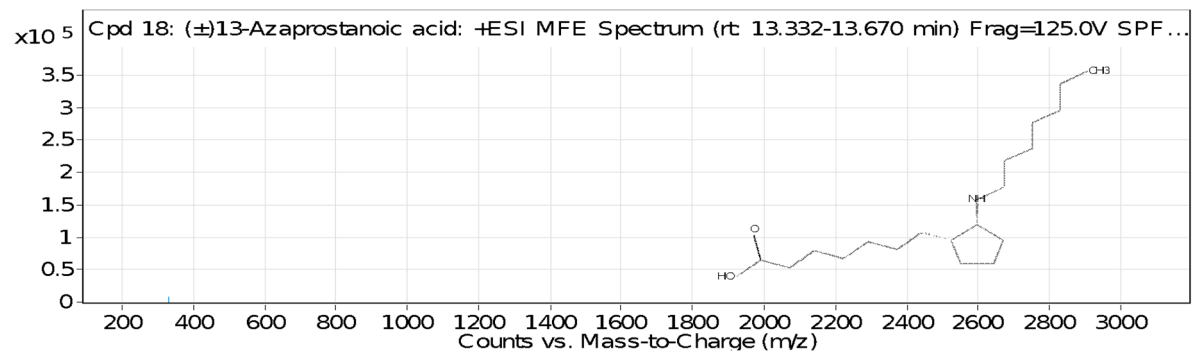

### Compound ix: Estra-1,3,5(10)-triene-2,17beta-diol

| Compound Label                               | Name                                        | m/z      | RT     | Algorithm                 | Mass     |
|----------------------------------------------|---------------------------------------------|----------|--------|---------------------------|----------|
| Cpd 19: Estra-1,3,5(10)-triene-2,17beta-diol | <b>Estra-1,3,5(10)-triene-2,17beta-diol</b> | 273.1848 | 14.323 | Find by Molecular Feature | 272.1774 |

### Compound Chromatograms

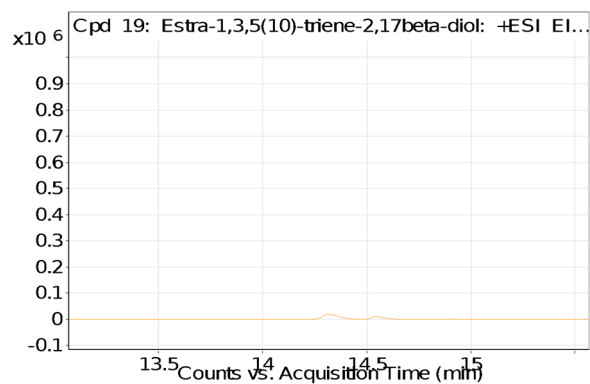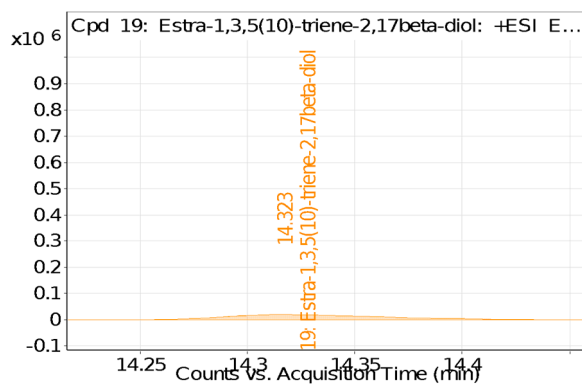

### MFE MS Spectrum

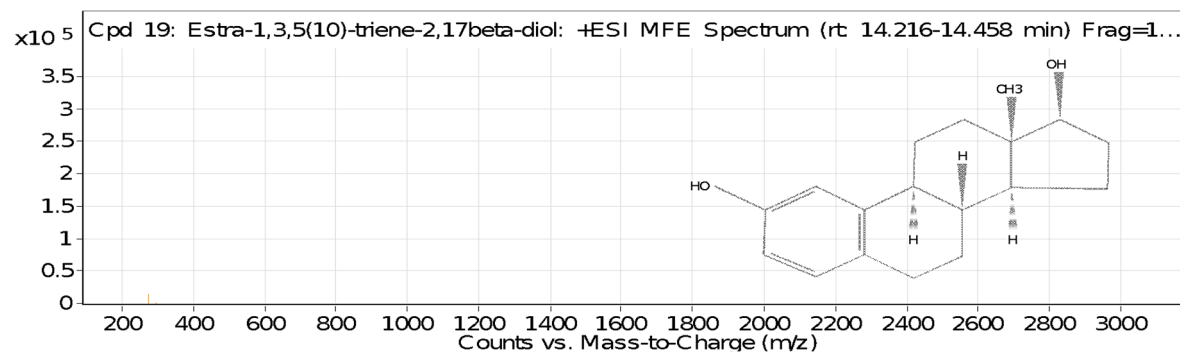

**Compound x: 15(S)-15-methyl PGF2 $\alpha$  ethyl amide**

| Compound Label                                    | Name                                      | <i>m/z</i> | RT     | Algorithm                 | Mass     |
|---------------------------------------------------|-------------------------------------------|------------|--------|---------------------------|----------|
| Cpd 22: 15(S)-15-methyl PGF2 $\alpha$ ethyl amide | 15(S)-15-methyl PGF2 $\alpha$ ethyl amide | 396.3106   | 16.521 | Find by Molecular Feature | 395.3029 |

**Compound Chromatograms**

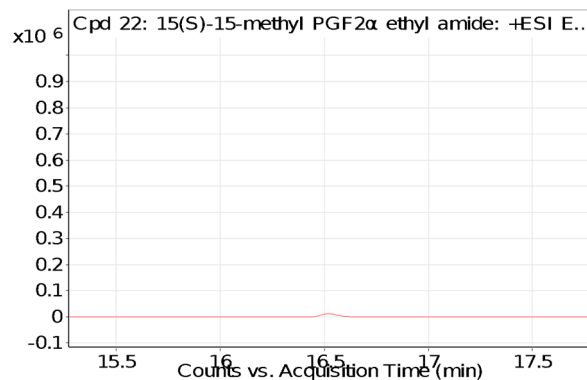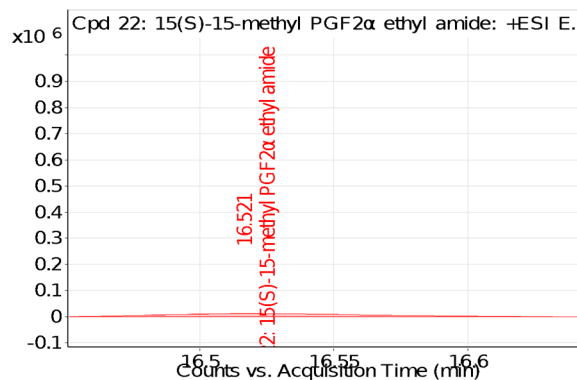

**MFE MS Spectrum**

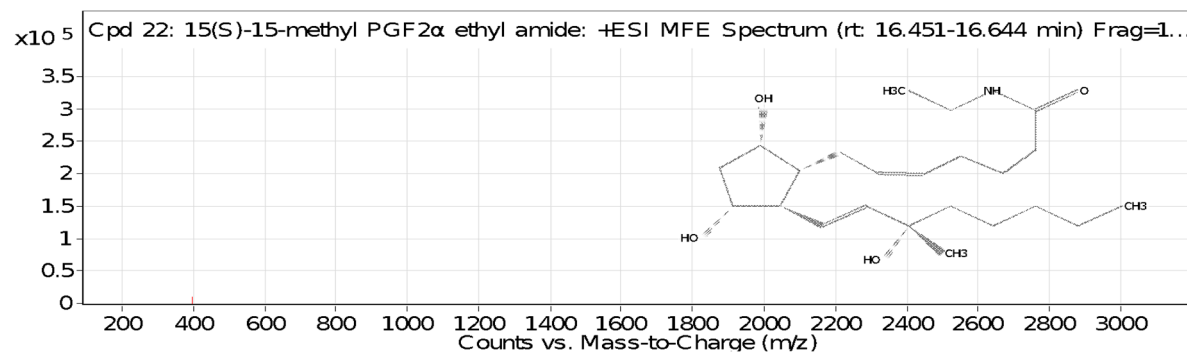

### Compound xi: Emmotin A

| Compound Label    | Name             | <i>m/z</i> | RT     | Algorithm                 | Mass     |
|-------------------|------------------|------------|--------|---------------------------|----------|
| Cpd 23: Emmotin A | <b>Emmotin A</b> | 279.1594   | 16.743 | Find by Molecular Feature | 278.1521 |

### Compound Chromatograms

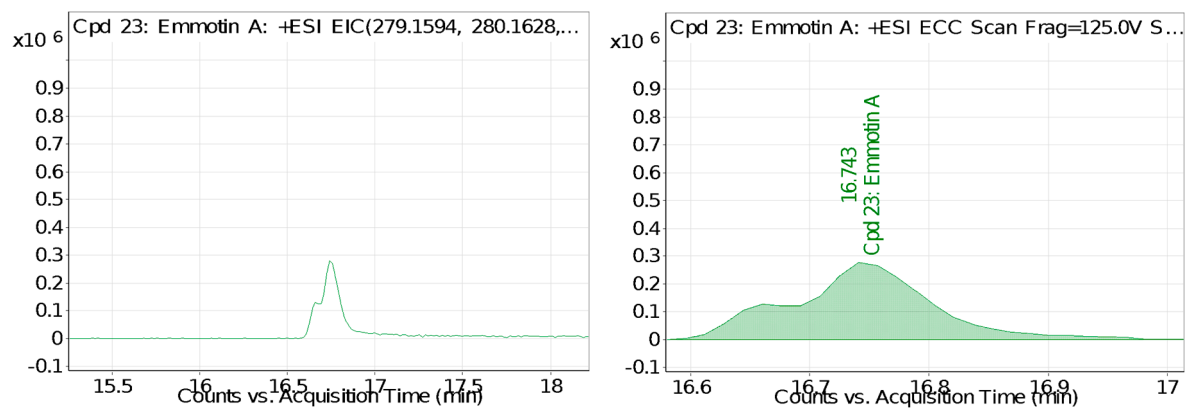

### MFE MS Spectrum

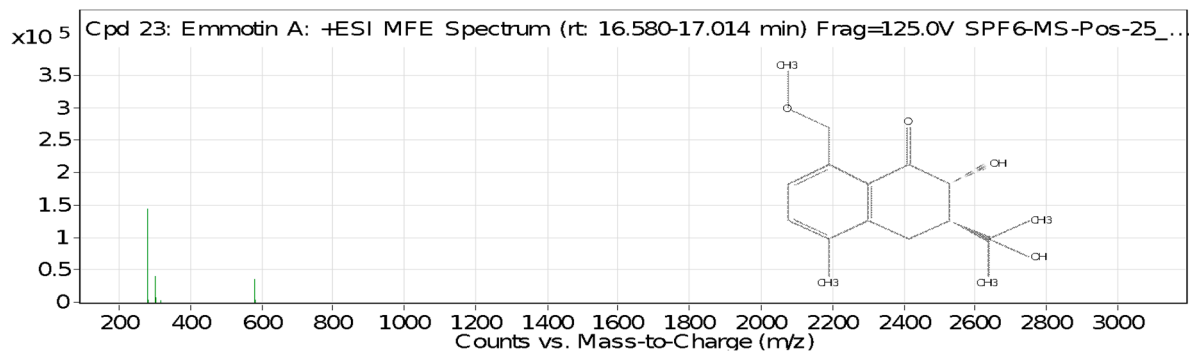

### Compound xii: 3-Butylidene-7-hydroxyphthalide

| Compound Label                          | Name                            | <i>m/z</i> | RT     | Algorithm                 | Mass     |
|-----------------------------------------|---------------------------------|------------|--------|---------------------------|----------|
| Cpd 25: 3-Butylidene-7-hydroxyphthalide | 3-Butylidene-7-hydroxyphthalide | 205.0858   | 16.755 | Find by Molecular Feature | 204.0786 |

### Compound Chromatograms

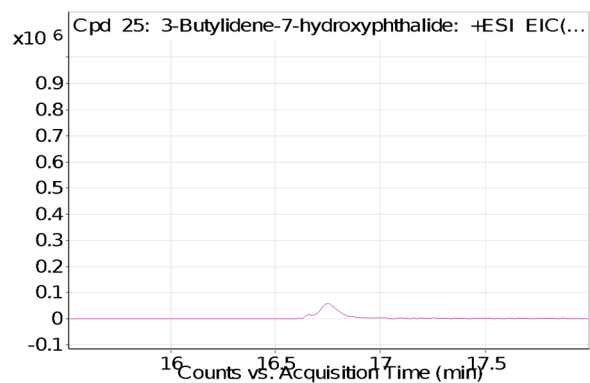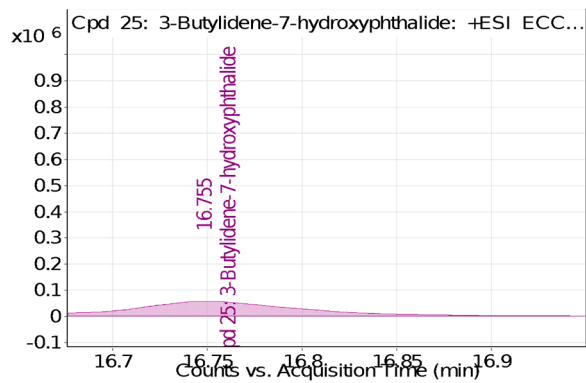

### MFE MS Spectrum

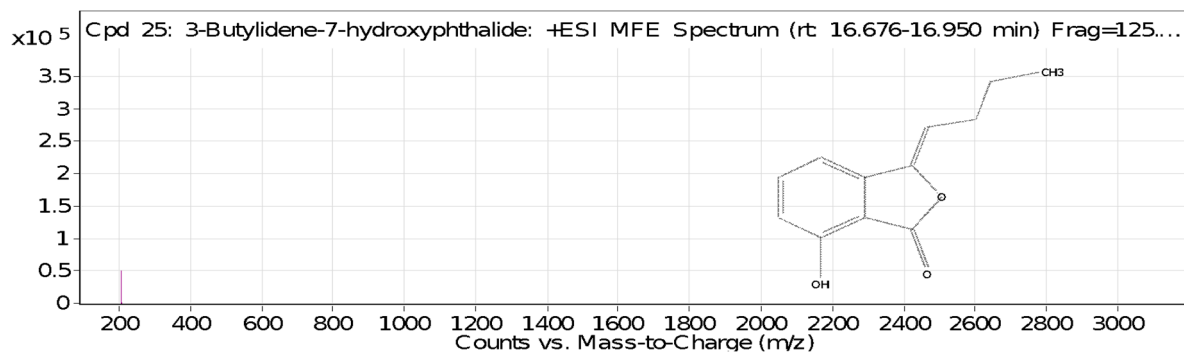

**Compound xiii: N-cis-tetradec-9Z-enoyl-L-Homoserine lactone**

| Compound Label                                       | Name                                                | <i>m/z</i> | RT     | Algorithm                 | Mass     |
|------------------------------------------------------|-----------------------------------------------------|------------|--------|---------------------------|----------|
| Cpd 26: N-cis-tetradec-9Z-enoyl-L-Homoserine lactone | <b>N-cis-tetradec-9Z-enoyl-L-Homoserine lactone</b> | 310.2374   | 16.922 | Find by Molecular Feature | 309.2303 |

**Compound Chromatograms**

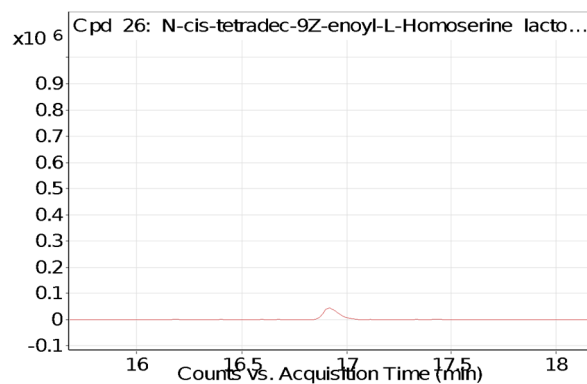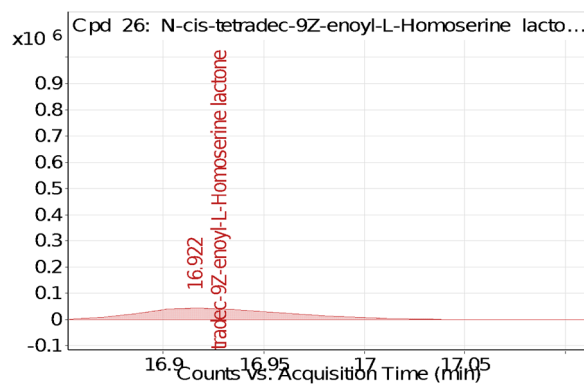

**MFE MS Spectrum**

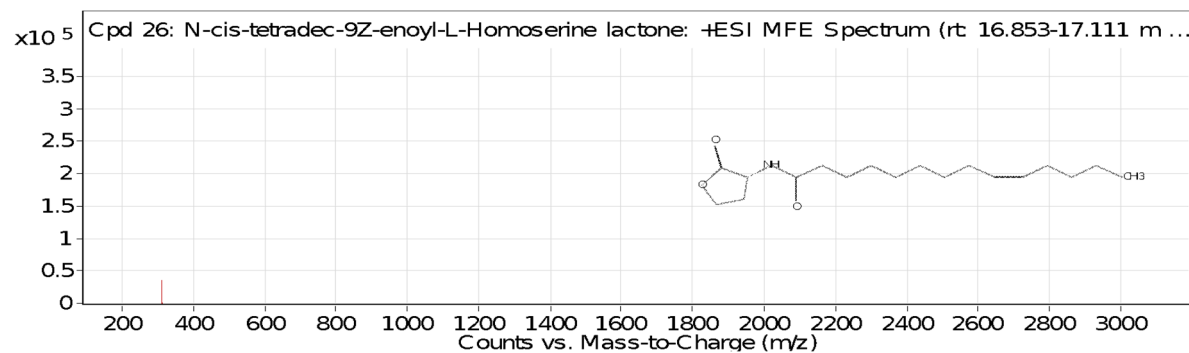

### Compound xiv: Stigmatellin Y

| Compound Label         | Name           | <i>m/z</i> | RT     | Algorithm                 | Mass     |
|------------------------|----------------|------------|--------|---------------------------|----------|
| Cpd 28: Stigmatellin Y | Stigmatellin Y | 502.3166   | 17.944 | Find by Molecular Feature | 484.2826 |

### Compound Chromatograms

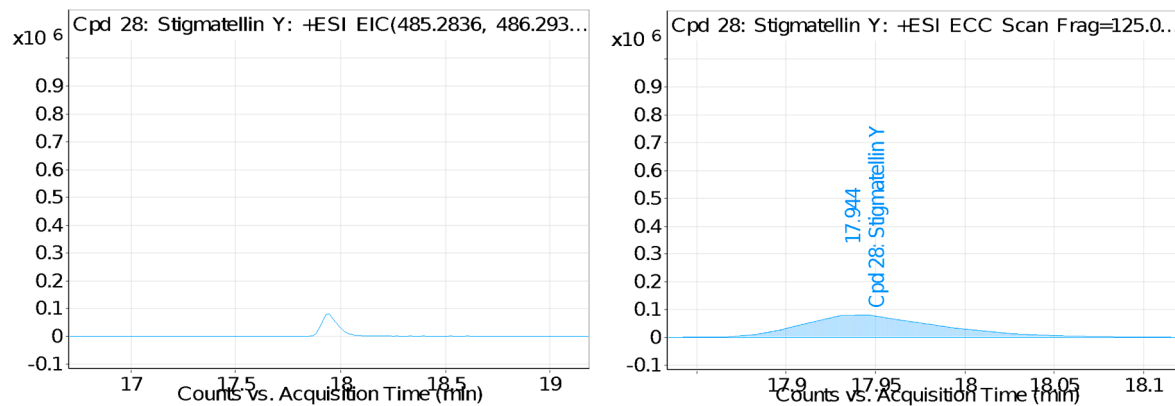

### MFE MS Spectrum

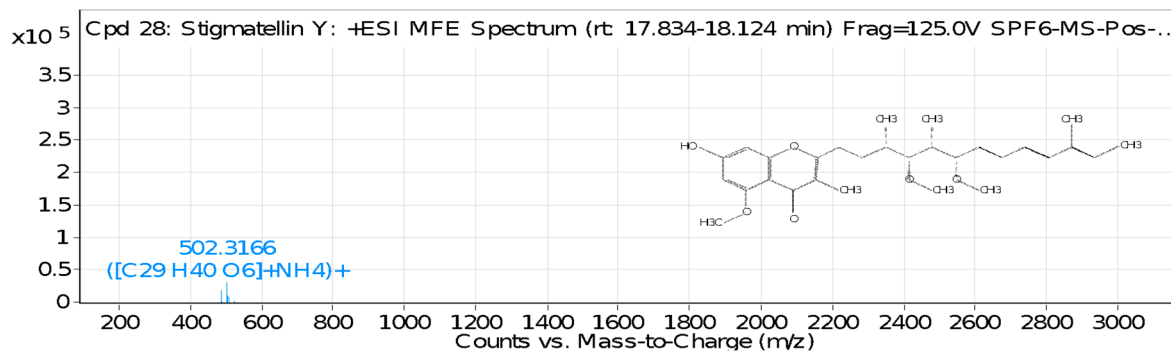



**Compound xv: Palmitic amide**

| Compound Label         | Name           | <i>m/z</i> | RT     | Algorithm                 | Mass     |
|------------------------|----------------|------------|--------|---------------------------|----------|
| Cpd 33: Palmitic amide | Palmitic amide | 256.2636   | 19.103 | Find by Molecular Feature | 255.2562 |

**Compound Chromatograms**

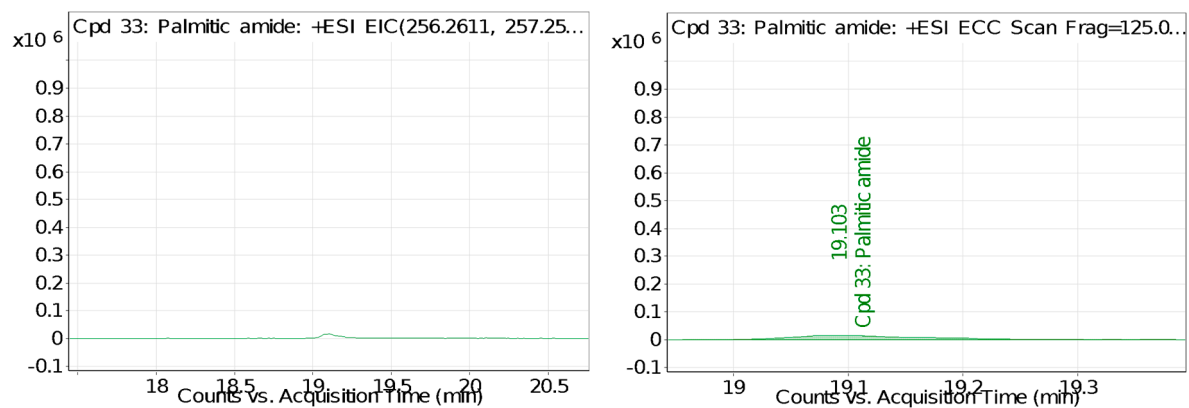

**MFE MS Spectrum**

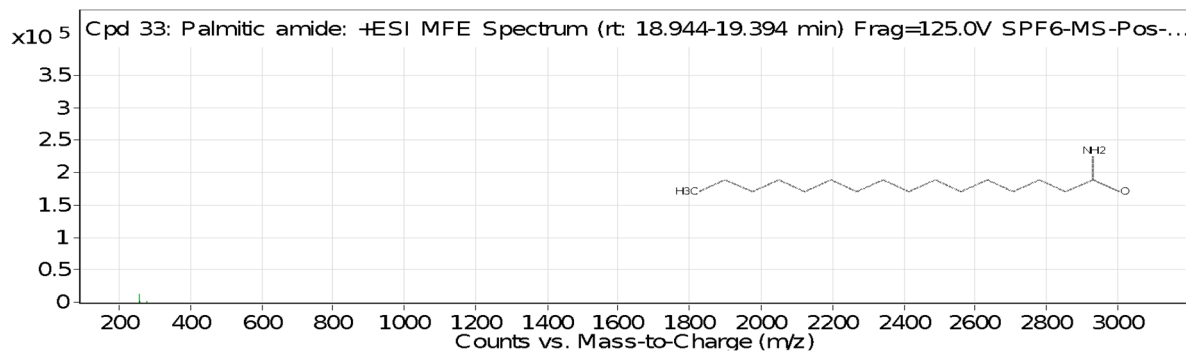

### Compound xvi: 1-monopalmitin

| Compound Label         | Name           | <i>m/z</i> | RT     | Algorithm                 | Mass     |
|------------------------|----------------|------------|--------|---------------------------|----------|
| Cpd 35: 1-monopalmitin | 1-monopalmitin | 353.2669   | 19.299 | Find by Molecular Feature | 330.2773 |

### Compound Chromatograms

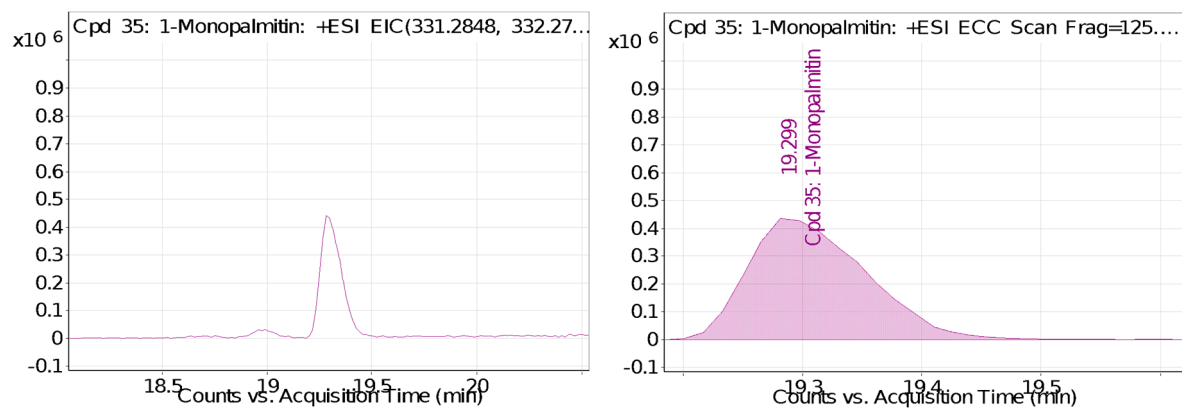

### MFE MS Spectrum

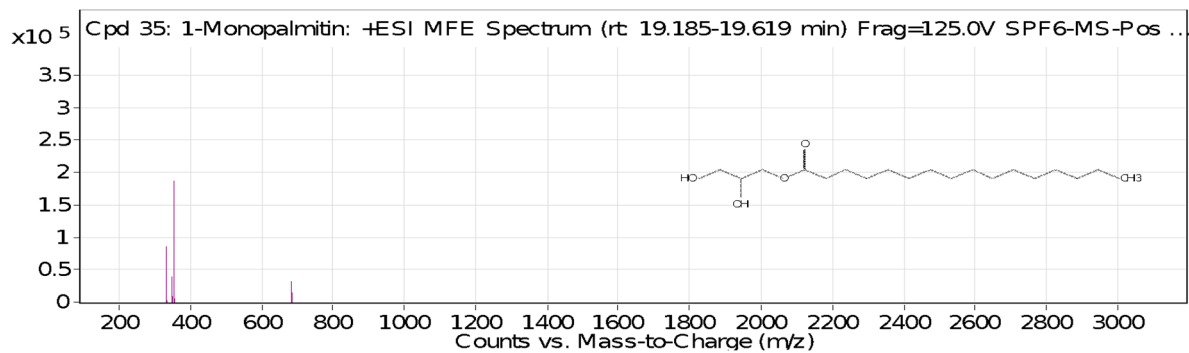

Compound xvii: Harderoporphyrin

| Compound Label           | Name             | m/z      | RT     | Algorithm                 | Mass     |
|--------------------------|------------------|----------|--------|---------------------------|----------|
| Cpd 38: Harderoporphyrin | Harderoporphyrin | 609.2708 | 19.495 | Find by Molecular Feature | 608.2636 |

Compound Chromatograms

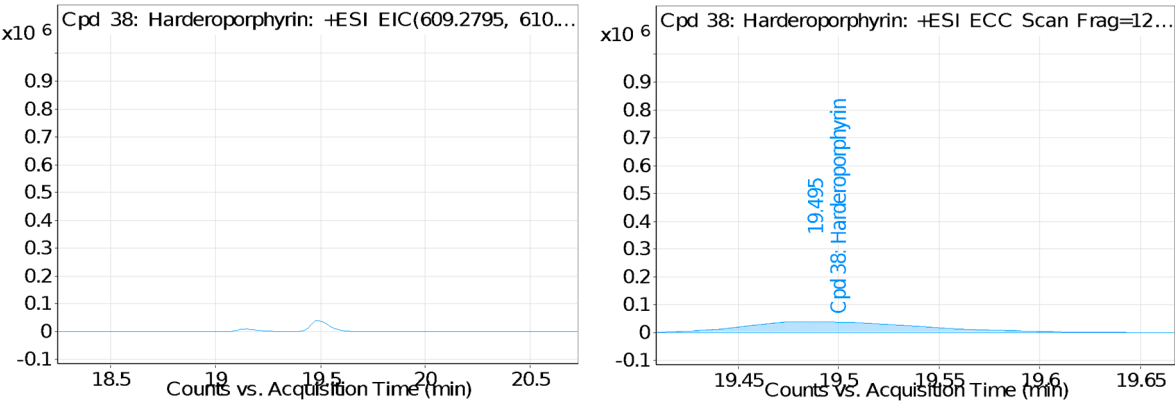

MFE MS Spectrum

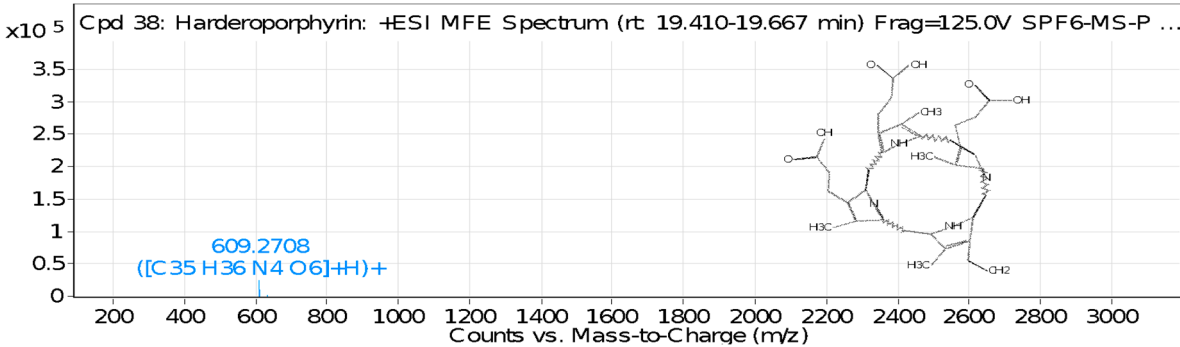

Compound xviii: Hexadecyl acetyl glycerol

| Compound Label                    | Name                      | m/z      | RT     | Algorithm                 | Mass     |
|-----------------------------------|---------------------------|----------|--------|---------------------------|----------|
| Cpd 46: Hexadecyl acetyl glycerol | Hexadecyl acetyl glycerol | 381.2983 | 20.782 | Find by Molecular Feature | 358.3092 |

Compound Chromatograms

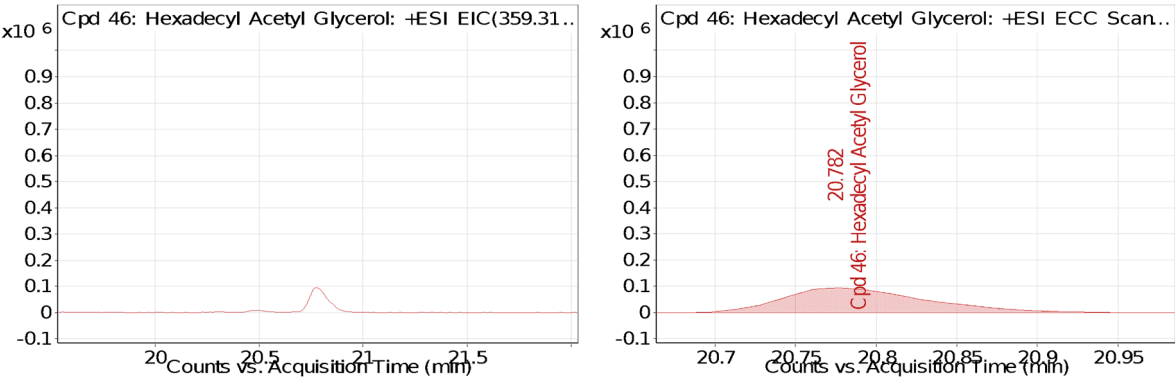

MFE MS Spectrum

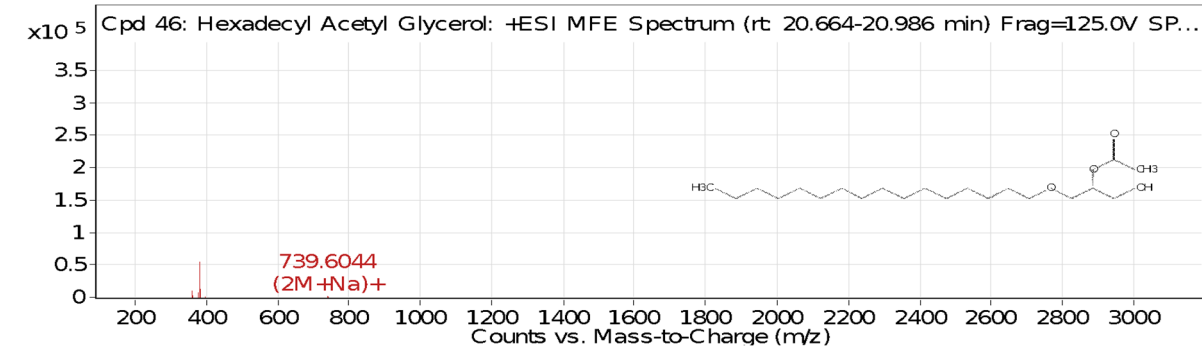

**Compound xix: 3 $\alpha$ ,12 $\alpha$ -Dihydroxy-5 $\beta$ -chol-8(14)-en-24-oic acid**

| Compound Label                                                                  | Name                                                                    | <i>m/z</i> | RT     | Algorithm                 | Mass    |
|---------------------------------------------------------------------------------|-------------------------------------------------------------------------|------------|--------|---------------------------|---------|
| Cpd 49: 3 $\alpha$ ,12 $\alpha$ -Dihydroxy-5 $\beta$ -chol-8(14)-en-24-oic acid | 3 $\alpha$ ,12 $\alpha$ -Dihydroxy-5 $\beta$ -chol-8(14)-en-24-oic acid | 391.2854   | 21.109 | Find by Molecular Feature | 390.278 |

**Compound Chromatograms**

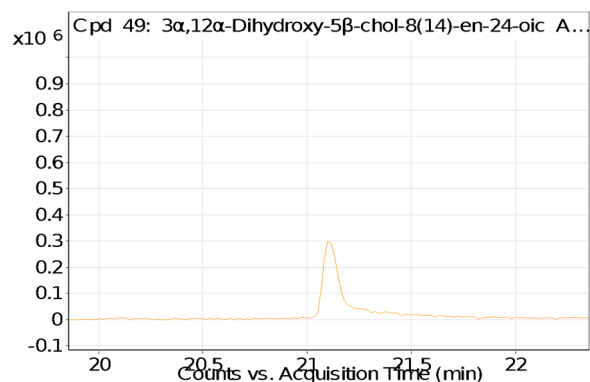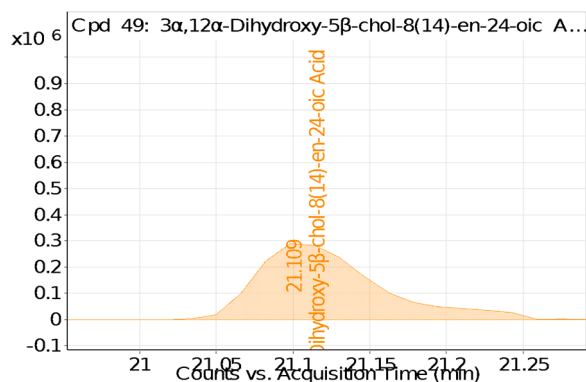

**MFE MS Spectrum**

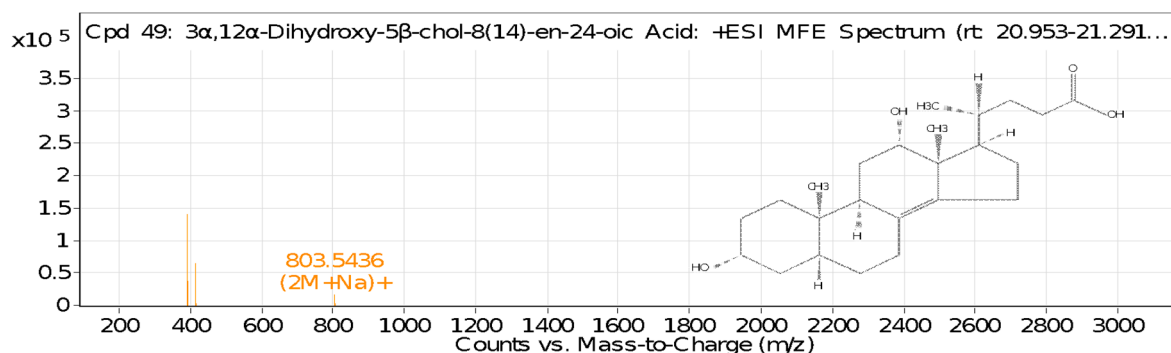

### Compound xx: Docosanedioic acid

| Compound Label             | Name               | <i>m/z</i> | RT     | Algorithm                 | Mass     |
|----------------------------|--------------------|------------|--------|---------------------------|----------|
| Cpd 51: Docosanedioic acid | Docosanedioic acid | 371.3151   | 21.202 | Find by Molecular Feature | 370.3077 |

### Compound Chromatograms

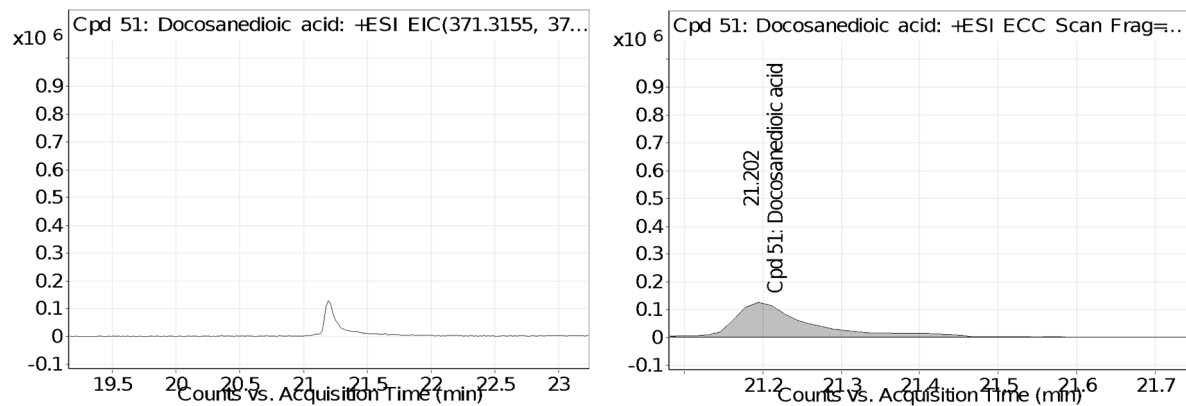

### MFE MS Spectrum

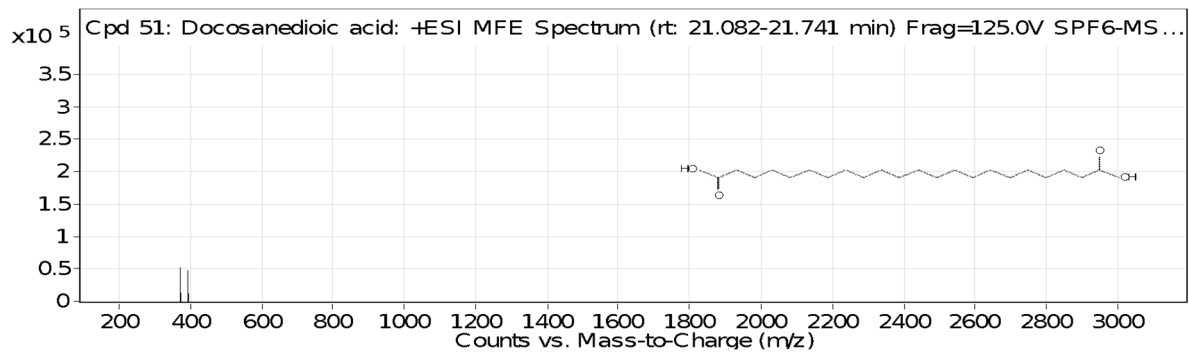

**Compound xxi: Hexacosanedioic acid**

| Compound Label               | Name                 | <i>m/z</i> | RT     | Algorithm                 | Mass     |
|------------------------------|----------------------|------------|--------|---------------------------|----------|
| Cpd 58: Hexacosanedioic acid | Hexacosanedioic acid | 449.3598   | 23.533 | Find by Molecular Feature | 426.3705 |

## Compound Chromatograms

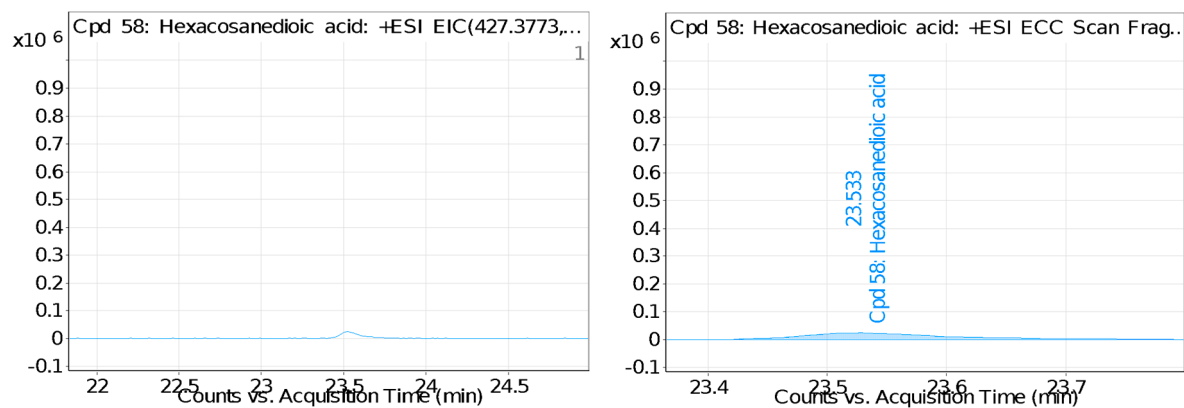

## MFE MS Spectrum

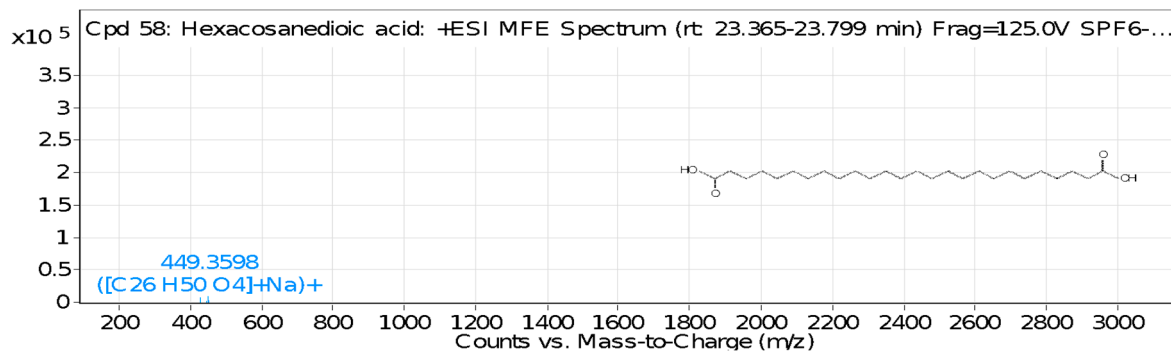

Supplement: s1 [file s1]
